# Supplementary material for: Bone Regeneration Potential of Human Dental Pulp Stem Cells Derived from Elderly Patients and Osteo-Induced by a Helioxanthin Derivative
Source: PubMed Central journal article supplement (PMC7590053; doi:10.3390/ijms21207731), 2020-10-19
Supplement: ijms-21-07731-s001.pdf [file ijms-21-07731-s001.pdf]

**Table S1.** Antibody dilutions and clone numbers for the FACS analysis

| Antibody            | Clone number | Dilution |
|---------------------|--------------|----------|
| PE anti-human CD14  | M5E2         | 1:20     |
| PE anti-human CD29  | TS2/16       | 1:20     |
| PE anti-human CD34  | 561          | 1:20     |
| PE anti-human CD44  | BJ18         | 1:20     |
| PE anti-human CD73  | AD2          | 1:20     |
| PE anti-human CD81  | 5A6          | 1:20     |
| PE anti-human CD90  | 5E10         | 1:20     |
| PE anti-human CD105 | 43A3         | 1:20     |
